# Supplementary figures and images for: Comparison of different methods aiming to account for/overcome matrix effects in LC/ESI/MS on the example of pesticide analyses
Source: Royal Society of Chemistry journal article supplement (doi:10.1039/c3ay26551j), 2013-01-01

### Average Trueness in spiked Garlic samples

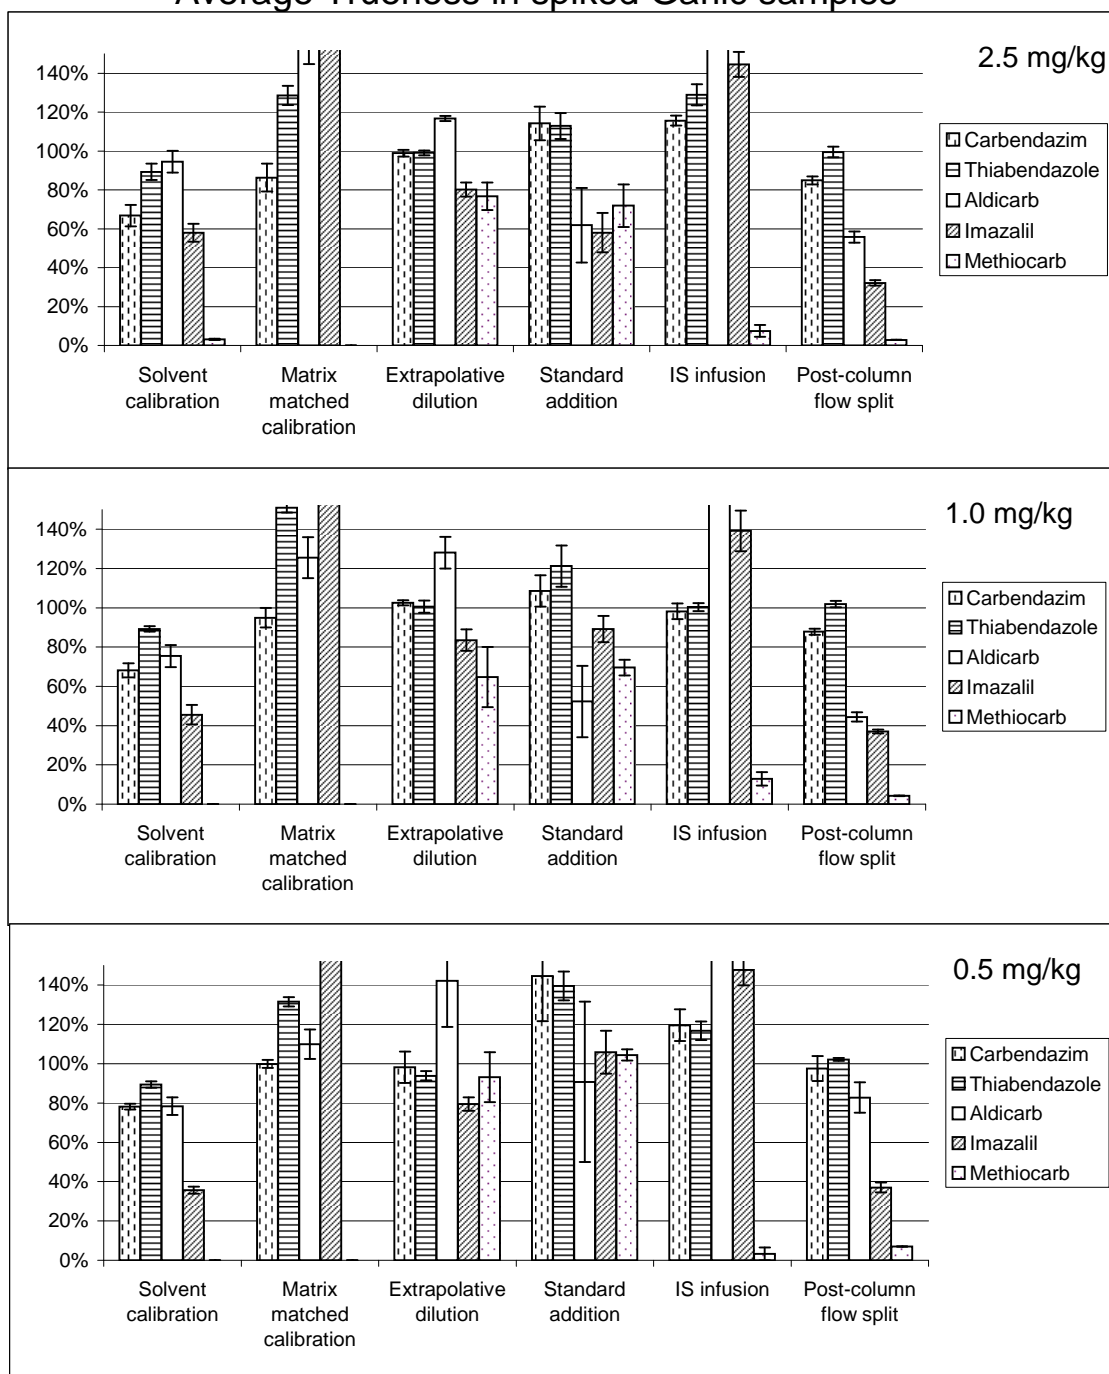

Supplement: c3ay26551j.pdf [file c3ay26551j.pdf]

### Average Trueness in spiked Onion samples

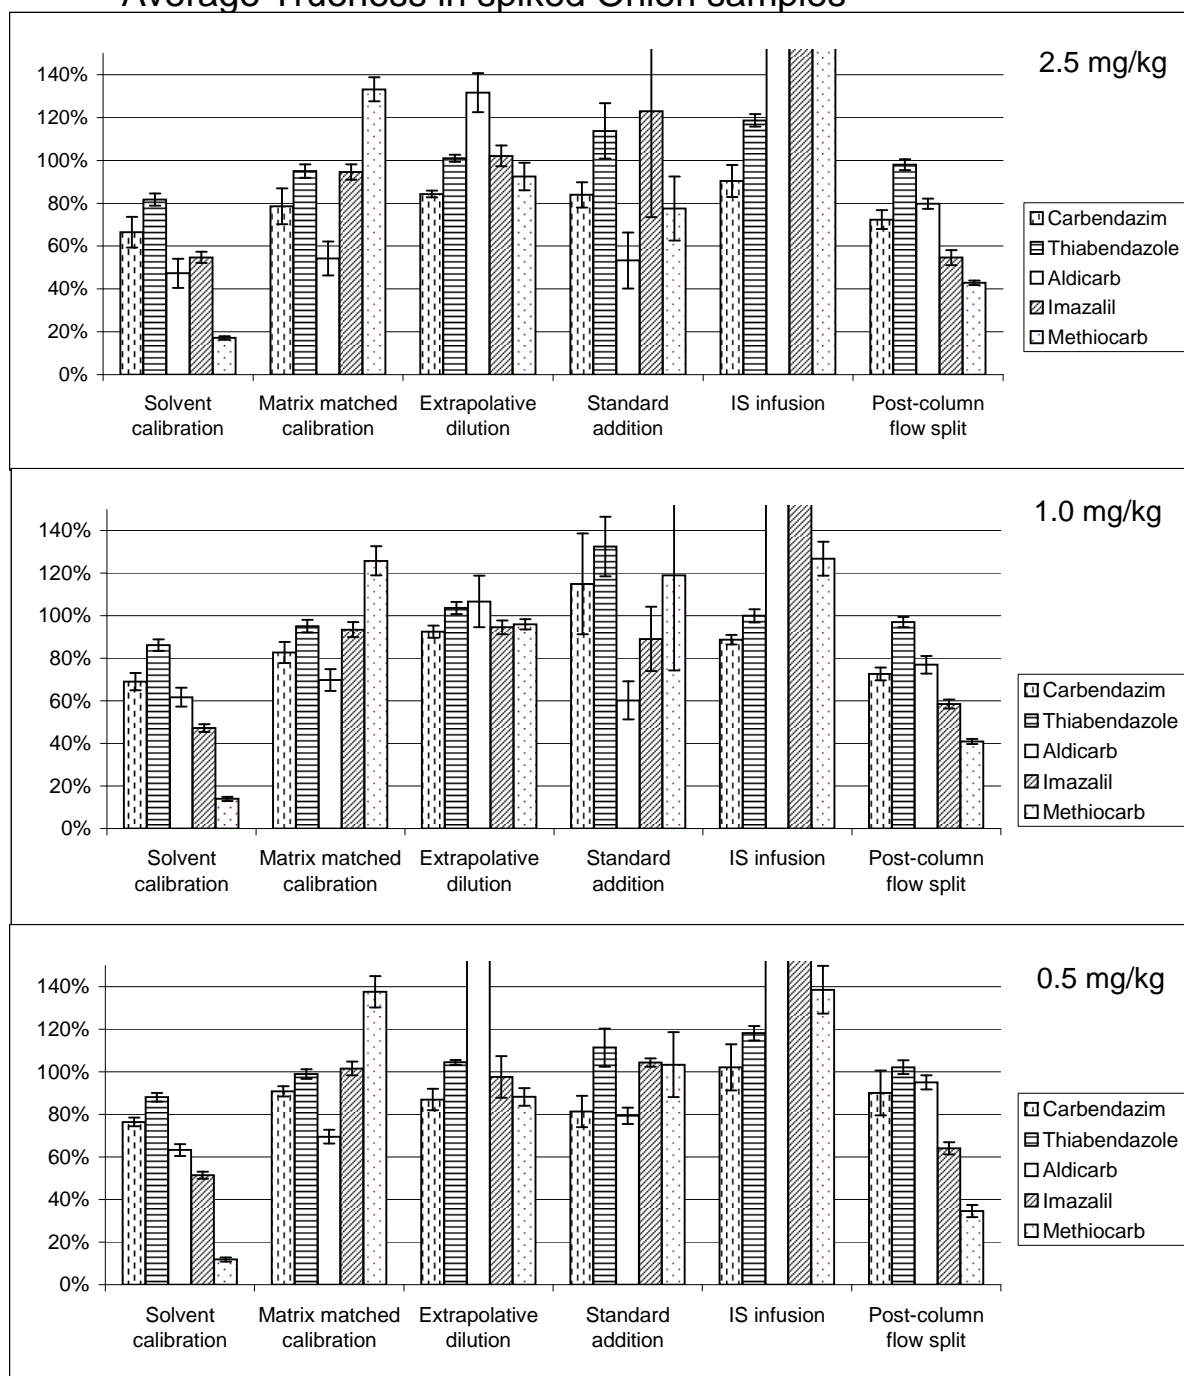

Supplement: c3ay26551j_2.pdf [file c3ay26551j_2.pdf]
